# Supplementary material for: HIV-1 envelope glycoprotein modulates CXCR4 clustering and dynamics on the T cell membrane
Source: eLife journal article supplement (doi:10.7554/elife.110354), 2026-05-12
Supplement: fig1-figsupp1-data2 [file Figure 1-Figure supplement 1-Source data 2.pdf › Figure 1-Figure supplement 1-Source data 2.pdf]

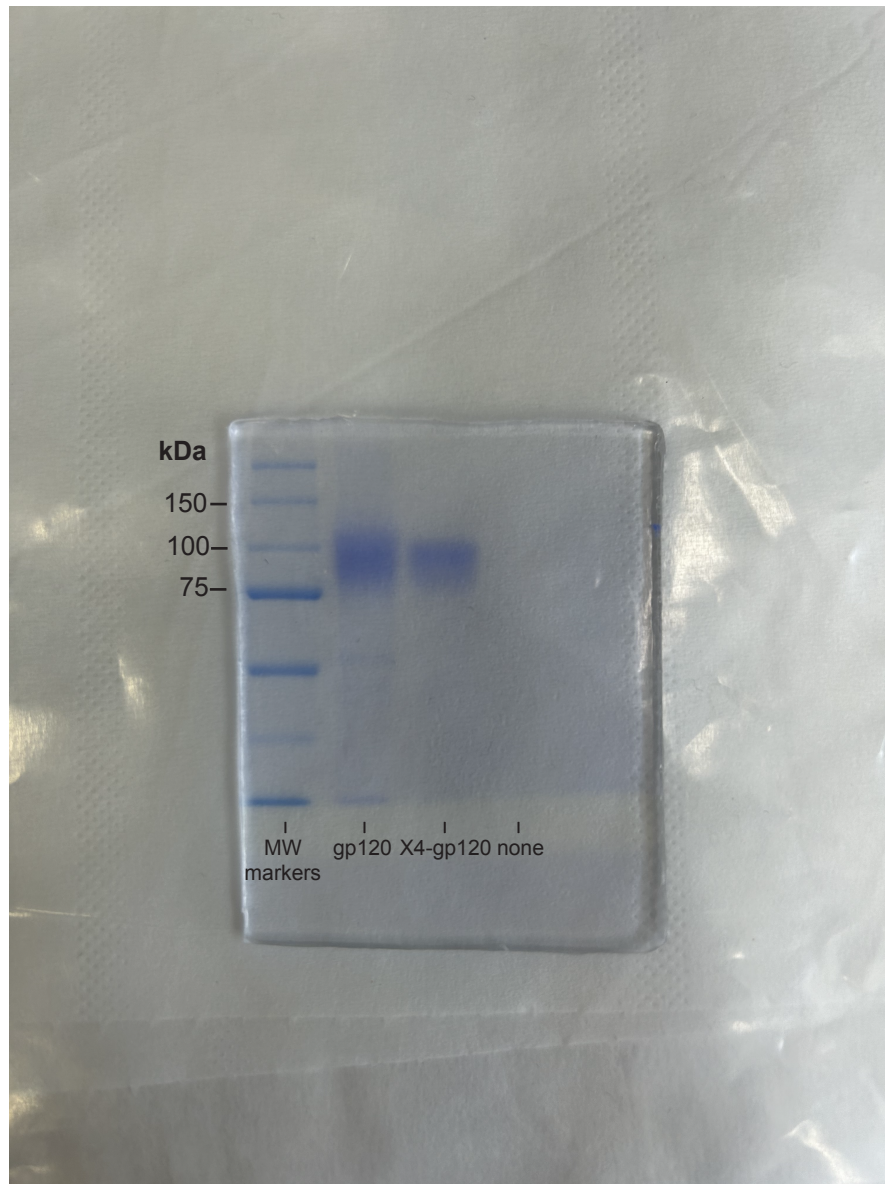

**Figure 1-Figure supplement 1-Source data 2**

**PDF file containing original Coomassie blue-stained polyacrylamide gel for Figure 1-Figure supplement 1A.**

Generation of functional recombinant X4-gp120. Coomassie blue-stained polyacrylamide gel of 5 µg of purified recombinant X4-gp120 and commercial gp120 (gp120), used as a control.

Original files for Coomassie blue-stained polyacrylamide gel displayed in Figure 1-Figure supplement 1-Source data 1.
