# Supplementary material for: HIV-1 envelope glycoprotein modulates CXCR4 clustering and dynamics on the T cell membrane
Source: eLife journal article supplement (doi:10.7554/elife.110354), 2026-05-12
Supplement: fig1-figsupp1-data4 [file Figure 1-Figure supplement 1-Source data 4.pdf › Figure 1-Figure supplement 1-Source data 4.pdf]

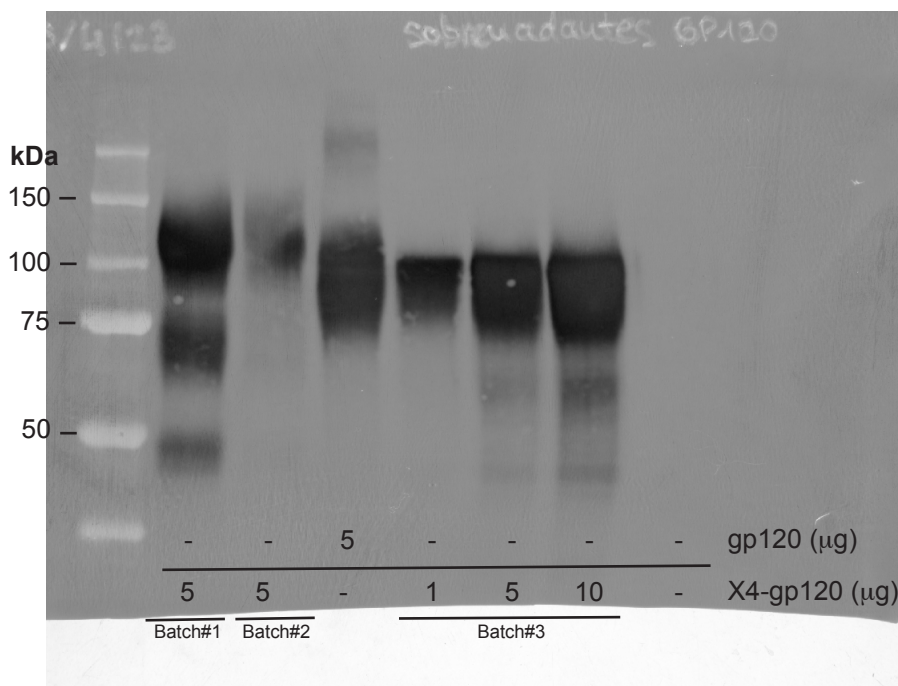

**Figure 1-Figure supplement 1-Source data 4.**

**PDF file containing original western blot for Figure 1-Figure supplement 1B.**

Original membrane corresponding to Figure 1-Figure supplement 1, panel B. Western blot of different amounts (μg indicated) of different batches of recombinant X4-gp120 and commercial gp120 (5 μg), used as control, analyzed with an anti-gp120 mAb. Batch#3 was selected for further assays.

Original files for western blot analysis displayed in Figure 1-Figure supplement 1-Source data 3.
