# Supplementary material for: HIV-1 envelope glycoprotein modulates CXCR4 clustering and dynamics on the T cell membrane
Source: eLife journal article supplement (doi:10.7554/elife.110354), 2026-05-12
Supplement: fig1-figsupp2-data2 [file Figure 1-Figure supplement 2-Source data 2.pdf › Figure 1-Figure supplement 2-Source data 2.pdf]

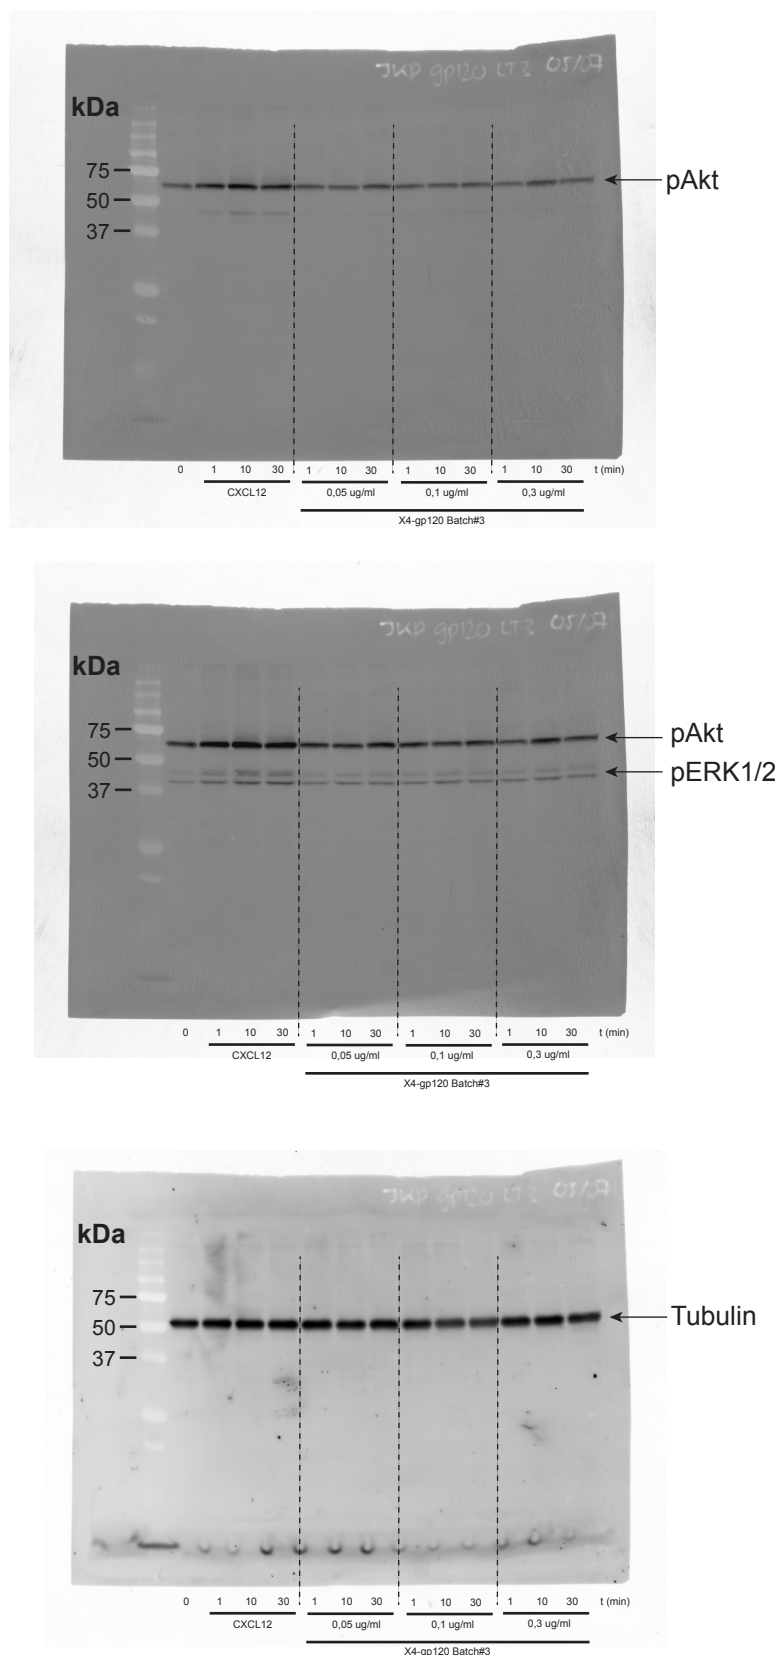

**Figure 1-Figure supplement 2-Source data 2.**

**PDF file containing original western blot for Figure 1-Figure supplement 2A.**

Original membrane corresponding to Figure 1-Figure supplement 2, panel A. Western blot of lysed Jurkat cells activated with CXCL12 (50 nM) or X4-gp120 Batch#3 (0.05; 0.1; 0.3 ug/ml) at the indicated time points and analyzed with anti-pAkt and pERK1/2 antibodies. Membrane were reblotted with an anti-tubulin mAb as a loading control. Molecular markers (kDa) are also shown. Figure 1-Figure supplement 2, panel A shows western blot of lysed Jurkat cells activated with CXCL12 (50 nM) and X4-gp120 Batch#3 0.3 ug/ml.

Original files for western blot analysis displayed in Figure 1-Figure supplement 2-Source data 1.
