# Supplementary material for: HIV-1 envelope glycoprotein modulates CXCR4 clustering and dynamics on the T cell membrane
Source: eLife journal article supplement (doi:10.7554/elife.110354), 2026-05-12
Supplement: fig1-figsupp2-data4 [file Figure 1-Figure supplement 2-Source data 4.pdf › Figure 1-Figure supplement 2-Source data 4.pdf]

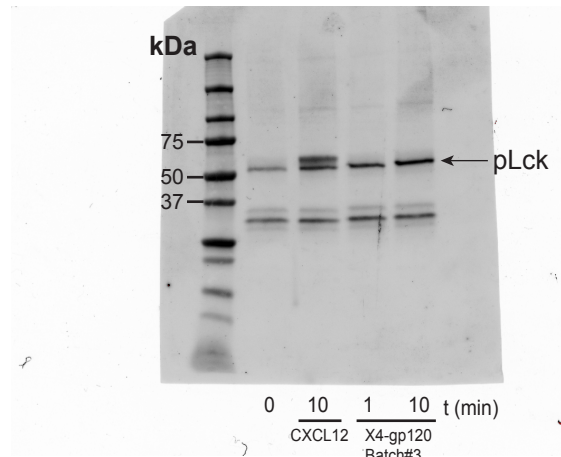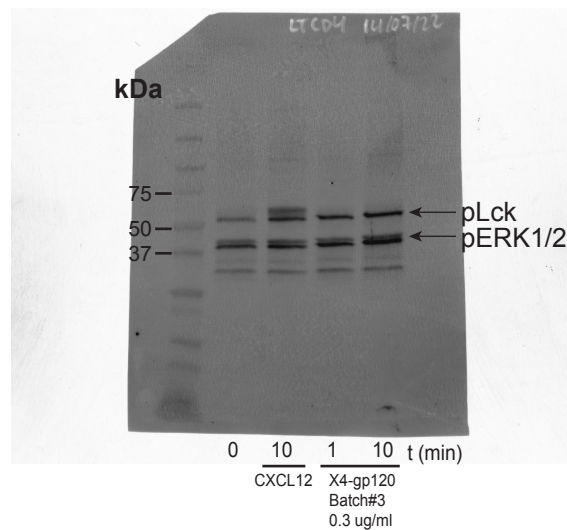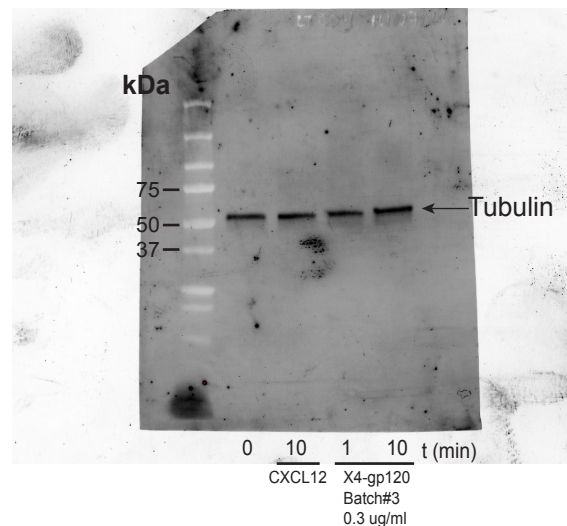

**Figure 1-Figure supplement 2-Source data 4.**

PDF file containing original western blot for Figure 1-Figure supplement 2B.

Original membrane corresponding to Figure 1-Figure supplement 2, panel B. Western blot of primary CD4<sup>+</sup> T blast lysates activated with CXCL12 (50nM) and X4-gp120 Batch#3 (0.3 ug/ml) at the indicated time points and analyzed using anti-pLck and -pERK1/2 antibodies. Membrane were reblotted with an anti-tubulin mAb as a loading control. Molecular markers (kDa) are also shown. Figure 1-Figure supplement 2, panel B shows western blot of lysed Jurkat cells activated with X4-gp120 Batch#3 0.3 ug/ml.

Original files for western blot analysis displayed in Figure 1-Figure supplement 2-Source data 3.
