# Supplementary material for: HIV-1 envelope glycoprotein modulates CXCR4 clustering and dynamics on the T cell membrane
Source: eLife journal article supplement (doi:10.7554/elife.110354), 2026-05-12
Supplement: fig2-figsupp1-data2 [file Figure 2-Figure supplement 1-Source data 2.pdf › Figure 2-Figure supplement 1-Source data 2.pdf]

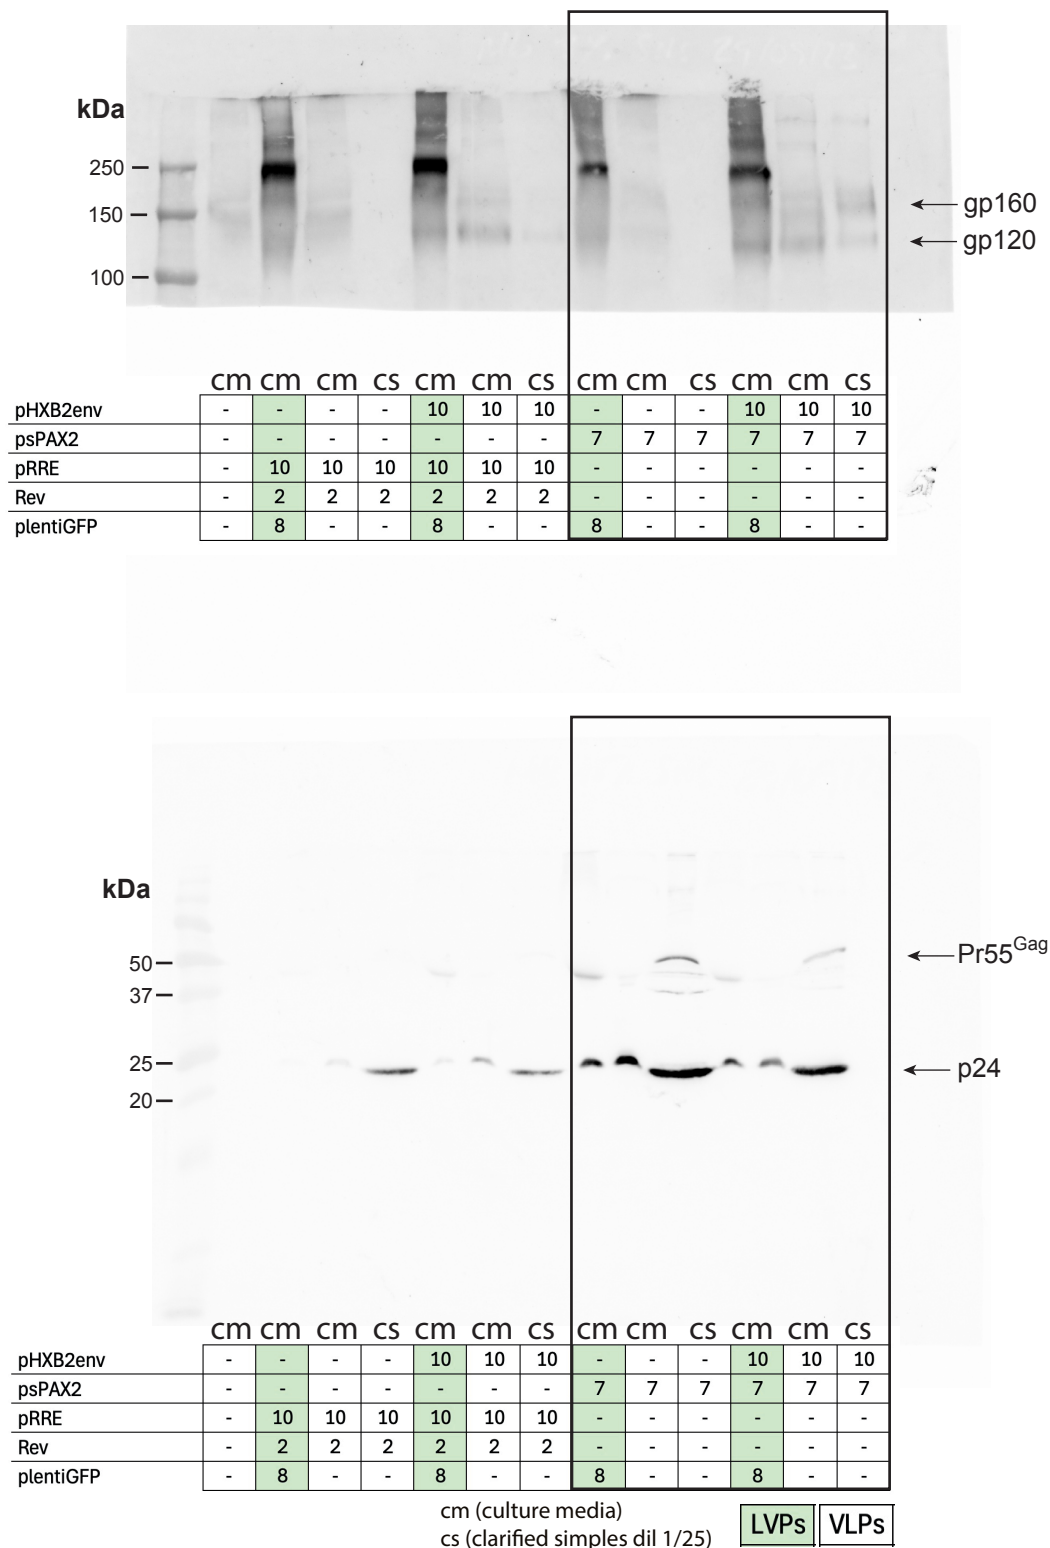

**Figure 2-Figure supplement 1-Source data 2.**

**PDF file containing original western blots for Figure 2-Figure supplement 1B.**

Original membranes corresponding to Figure 2-Figure supplement 1, panel B. Culture media of transfected HEK-293T cells (cm) with different constructs, as indicated, and the corresponding clarified samples (cs) containing the VLPs or the LVPs generated, were analyzed by western blot with anti-p24, and -gp120 mAbs. The anti-p24 mAb also recognizes Pr55<sup>Gag</sup>, a precursor of p24 presents in immature particles. Molecular weight markers are indicated (kDa). Figure 2-Figure supplement 1, panel B shows the last six lanes of these membranes reorganized to separate LVPs from VLPs.

Original files for western blot analysis displayed in Figure 2-Figure supplement 1-Source data 1.
